# Supplementary material
Source: publisher figshare collection journal article supplement (https://acs.figshare.com/ndownloader/files/27803570)
Supplement: Supplementary file 1 [file 27803570]

Compound	Smiles
3	NC(N=CN1CC2=C(Cl)C=CC=C2Cl)=C3C1=NC=N3
4a	NC(N=CN1CC2=C(Cl)C=CC=C2Cl)=C3C1=NC(C)=N3
4b	NC(N=CN1CC2=C(Cl)C=CC=C2Cl)=C3C1=NC(C4=CC=CC=C4)=N3
4c	NC(N=CN1CC2=C(Cl)C=CC=C2Cl)=C3C1=NC(Br)=N3
4d	NC(N=CN1CC2=C(Cl)C=CC=C2Cl)=C3C1=NC(Cl)=N3
5a	NC(N=CN1CC2=C(Cl)C=CC=C2Cl)=C3C1=NC(C4=C(Cl)C=CC=C4)=N3
5b	NC(N=CN1CC2=C(Cl)C=CC=C2Cl)=C3C1=NC(C4=CC(Cl)=CC=C4)=N3
5c	NC(N=CN1CC2=C(Cl)C=CC=C2Cl)=C3C1=NC(C4=CC=C(Cl)C=C4)=N3
5d	NC(N=CN1CC2=C(Cl)C=CC=C2Cl)=C3C1=NC(C4=C(C)C=CC=C4)=N3
5e	NC(N=CN1CC2=C(Cl)C=CC=C2Cl)=C3C1=NC(C4=CC(C)=CC=C4)=N3
5f	NC(N=CN1CC2=C(Cl)C=CC=C2Cl)=C3C1=NC(C4=CC=C(C)C=C4)=N3
5g	NC(N=CN1CC2=C(Cl)C=CC=C2Cl)=C3C1=NC(C4=C(F)C=CC=C4)=N3
5h	NC(N=CN1CC2=C(Cl)C=CC=C2Cl)=C3C1=NC(C4=CC(F)=CC=C4)=N3
5i	NC(N=CN1CC2=C(Cl)C=CC=C2Cl)=C3C1=NC(C4=CC=C(F)C=C4)=N3
5j	NC(N=CN1CC2=C(Cl)C=CC=C2Cl)=C3C1=NC(C4=C(OC)C=CC=C4)=N3
5k	NC(N=CN1CC2=C(Cl)C=CC=C2Cl)=C3C1=NC(C4=C(C#N)C=CC=C4)=N3
6a	NC(N=CN1CC2=CC=CC=C2)=C3C1=NC=N3
6b	NC(N=CN1CC2=C(Cl)C=CC=C2)=C3C1=NC=N3
6c	NC(N=CN1CC2=C(Cl)C=C(Cl)C=C2)=C3C1=NC=N3
6d	NC(N=CN1CC2=CC(Cl)=CC=C2)=C3C1=NC=N3
6e	NC(N=CN1CC2=CC=C(Cl)C=C2)=C3C1=NC=N3
6f	NC(N=CN1CC2=C(C)C=CC=C2C)=C3C1=NC=N3
6g	NC(N=CN1CC2=C(Cl)C=NC=C2Cl)=C3C1=NC=N3
6h	NC(N=CN1CC2=C(Cl)C=NC=C2Cl)=C3C1=NC(C4=C(C)C=CC=C4)=N3
